# Supplementary material
Source: PubMed Central journal article supplement (PMC3732935)
Supplement: 1300318110_pnas.201300318SI.pdf [file 1300318110_pnas.201300318SI.pdf]

# Supporting Information

Zindl et al. 10.1073/pnas.1300318110

## SI Materials and Methods

**Mice.** *Myd88*<sup>-/-</sup> mice were kindly provided by S. Michalek (University of Alabama at Birmingham, Birmingham, AL).

**Isolation of Colon Cells.** Colon tissue was flushed, opened longitudinally, and then cut into strips 1 cm in length. Tissue pieces were incubated for 30–40 min at 37 °C with either collagenase D (2 mg/mL; Sigma) or collagenase B (2 mg/mL; Roche) and DNase (1 mg/mL; Sigma). Cells then were purified on a 40%/75% Percoll (vol/vol) gradient by centrifugation for 20 min at 25 °C and 600 × *g* with no brake.

**Isolation of Bone Marrow Neutrophils.** Bone marrow cells were harvested by flushing the tibia and femur bones with R10 medium (Roswell Park Memorial Institute) and pipetting up and down to break up the marrow into a single-cell suspension. Cells first were purified on a 50%/60% (vol/vol) Percoll gradient by centrifugation for 20 min at 25 °C and 600 × *g* with no brake, followed by FACS sorting on CD11b<sup>+</sup>Ly6B.2<sup>+</sup>FSC<sup>int</sup>SSC<sup>int</sup> cells. Donor bone marrow neutrophils were negative for CD4, NK1.1, and F4/80.

**Isolation of Lung Neutrophils.** Lungs were perfused with PBS, minced, and then incubated for 30 min at 37 °C with intermittent agitation in Roswell Park Memorial Institute (RPMI) 1640 with collagenase B (2 mg/mL; Roche) and DNase (1 mg/mL; Sigma). Cells were collected in R-20 (20% serum) and were FACS sorted on CD11b<sup>+</sup>Ly6G<sup>+</sup>F4/80<sup>-</sup>CD11c<sup>-</sup>FSC<sup>int</sup>SSC<sup>int</sup> cells.

**Real-Time PCR.** RNA was isolated with the RNeasy kit (QIAGEN), and DNase treated with DNA-free (Ambion). cDNA synthesis was performed with the SuperScript III first-strand synthesis system (Invitrogen) and analyzed with Platinum qPCR Supermix UDG for Taqman primers per probe or Sybr GreenER qPCR supermix (Invitrogen) in a Bio-Rad iCycler. The primer sequences were purchased from Integrated DNA Technologies and are shown in Table S1.

**ELISA.** IL-6, IL-17, IL-22, and macrophage inflammatory protein 2 (MIP-2) ELISA kits were purchased from R&D Systems, and ELISA was performed according to the manufacturer's instructions.

**Flow Cytometry.** Colon cells were stained with FcBlock (BD Biosciences) followed by staining with fluorescent-labeled antibodies. For intracellular cytokine staining, cells were stimulated for 4 h with recombinant mouse IL-23 (rmIL-23) (R&D Systems) and GolgiPlug (BD Biosciences) and then were processed using the FoxP3 staining buffer set (eBioscience). Samples were acquired on an LSRII flow cytometer (BD Biosciences) and analyzed by FlowJo software (Treestar).

**Tissue and Cell Preparation.** For immunostaining experiments, colons were fixed in 2% (vol/vol) paraformaldehyde (PFA) for 2 h at room temperature, were washed in PBS, and then were cushioned in cold, sterile 20% sucrose (wt/vol). Tissue then was rinsed briefly in cold PBS, cut into equal segments (proximal, middle, and distal), embedded in O.C.T. (Tissue-Tek), and frozen with 2-methyl butane chilled with liquid nitrogen. For histological analysis, colons were segmented as above, cut longitudinally, and placed immediately in 10% buffered formalin (Fisher) and processed for paraffin embedding and H&E staining. For cytospin preparations, sorted neutrophils were stimulated for 4 h with rmIL-23 and GolgiPlug and then were cytospun at 170 × *g* for 5 min. Cells were fixed with 4% (vol/vol) PFA for 15 min at room temperature, washed in PBS, and then placed in methanol with 0.3% H<sub>2</sub>O<sub>2</sub> to quench endogenous peroxidase activity. To allow for sufficient permeabilization, 1% Triton X-100 and saponin were used in the staining buffer.

**Electron Microscopy.** Sorted colon cells and splenic red blood cells purified with anti-Ter-119 MACS beads (Miltenyi) (to help visualize pelleted cells) were fixed with Karnovsky's Fixative (Electron Microscopy Sciences). The cells were processed further for osmification, embedding, and analysis at the High Resolution Imaging Facility at the University of Alabama at Birmingham (Birmingham, AL) using an FEI Tecnai 12 transmission electron microscope.

**Antibodies and Reagents.** The following antibodies and reagents were purchased from BD Biosciences or eBiosciences: anti-CD16/CD32 (2.4G2; FcBlock), anti-CD11b phycoerythrin (PE) or APC (M1/70), anti-Ly6C biotin (AL-21), anti-Ly6G FITC (1A8), anti-IL-22 PE (1H8PWSR), anti-rat Ig biotin, and anti-Epcam1 FITC. The following antibodies were purchased from Serotec: anti-F4/80 (CI:A3-1) and anti-Ly6B.2 (7/4). The following antibodies and cytokines were purchased from R&D Systems: anti-mouse S100A8, anti-mouse RegIIIβ, rmIL-23, and rmTNF. Streptavidin-PE/CY7 was purchased from Southern Biotech. Streptavidin-Alexa Fluor 594, Prolong Gold with DAPI, and LIVE/DEAD dye were from Invitrogen. Dextran sodium sulfate (DSS) salt (molecular weight = 36,000–50,000; MP Bio-medicals) was purchased from Fisher Scientific. Control mouse Ig was purchased from Sigma, and the mouse anti-human IL-22–blocking antibody (clone 8E11) was kindly provided by W. Ouyang from Genentech (South San Francisco, CA).

**Antibiotic Treatment.** Mice were pretreated 1 wk before and during DSS treatment with 1 mg/mL ceftazidime, 1 mg/mL metronidazole, or 0.5 mg/mL vancomycin (Sigma) in their drinking water.





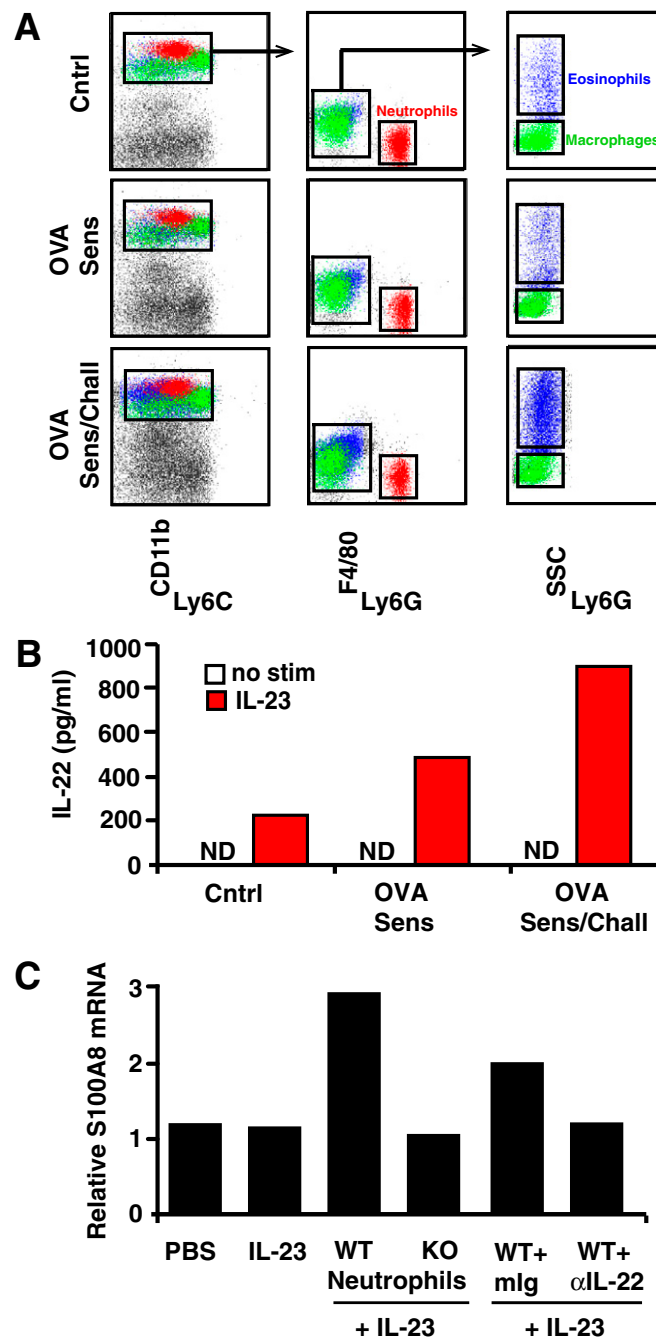

**Fig. 54.** Neutrophils isolated from the lungs of asthmatic mice produce IL-22 protein. C57BL/6J or BALB/c mice were sensitized with i.p. injections of ovalbumin (OVA) with alum on days 1 and 7, followed by a PBS (OVA sens) or OVA (OVA Sens/Chall) challenge via intranasal instillation of OVA on day 14. (A) Four to five days later, cells were isolated from the lungs, were stained with anti-CD11b, anti-Ly6C, anti-Ly6G, and anti-F4/80, and were analyzed by flow cytometry. (B) Lung neutrophils ( $FSC^{int}SSC^{int}CD11b^{+}Ly6C^{+}Ly6G^{+}F4/80^{-}CD11c^{-}$ ) were sorted and cultured in the absence or presence of rmlL-23 for 2.5–3 d. Supernatant was analyzed for IL-22 protein levels by ELISA. ND, not detected. (C) Lung neutrophils from WT or  $IL22^{-/-}$  (KO) mice were sorted and cultured with cells derived from the colons of young adult mice (YAMC cells) for 48 h. Cells were stimulated with rmlL-23 in the presence or absence of either a control mouse antibody or blocking anti-IL22 antibody. Cell lysate was analyzed for S100A8 mRNA levels by real-time PCR. S100A mRNA levels were normalized to GAPDH. Data are representative of three independent sorting experiments.

**Table S1. Primer sequences used in real-time PCR**

|                    |                                             |
|--------------------|---------------------------------------------|
| IL-22 FOR          | TCC GAG GAG TCA GTG CTA A                   |
| IL-22 REV          | AGA ACG TCT TCC AGG GTG AA                  |
| IL-22 probe        | FAM-TGC TAC CTG ATG AAG CAG TGC T           |
| IL-23R FOR         | TCA GTG CTA CAA TCT TCA GAG GAC A           |
| IL-23R REV         | GCC AAG AAG ACC ATT CCC GA                  |
| IL-23R probe       | FAM-CCT GCT TCA GGT AAT CAT CAA GAC         |
| RegIII $\beta$ FOR | ATA CCC TCC GCA CGC ATT AGT T               |
| RegIII $\beta$ REV | AGG CCA GTT CTG CAT CAA ACC A               |
| S100A8 FOR         | TGA GTG TCC TCA GTT TGT GCA G               |
| S100A8 REV         | TGT GAG ATG CCA CAC CCA CTT T               |
| S100A9 FOR         | CAA ATG GTG GAA GCA CAG TTG GCA             |
| S100A9 REV         | TTG TGT CCA GGT CCT CCA TGA TGT             |
| Ahr FOR            | CCT GAG GGC CAA GAG CTT CT                  |
| Ahr REV            | CCT GGC CTC CAT TTC TGT CA                  |
| RORyt FOR          | GGA GGA CAG GGA GCC AAG TT                  |
| RORyt REV          | TTG TCC CCA CAG ATC TTG CA                  |
| GAPDH FOR          | TCC ATG ACA ACT TTG GCA TTG                 |
| GAPDH REV          | CAG TCT GGG TGG CAG TGA                     |
| GAPDH probe        | TxRd-AGG GCT CAT GAC CAC AGT CCA TGC C-BHQ2 |

FOR, forward; IL-23R, IL-23 receptor ; REV, reverse. RORyt, retinoic acid-related orphan receptor  $\gamma$ T. Ahr, aryl hydrocarbon receptor.
